# Supplementary material for: Elevated Glutathione Peroxidase 2 Expression Promotes Cisplatin Resistance in Lung Adenocarcinoma
Source: Hindawi journal article supplement (doi:10.1155/2020/7370157), 2020-03-06
Supplement: f2 [file 7370157.f2.xlt]

## Sheet: HALLMARK_GLYCOLYSIS
NAME	PROBE	DESCRIPTION<br>(from dataset)	GENE SYMBOL	GENE_TITLE	RANK IN GENE LIST	RANK METRIC SCORE	RUNNING ES	CORE ENRICHMENT
row_0	ABCB6	na	null	null	12	0.582382	0.0196838	Yes
row_1	TALDO1	na	null	null	17	0.556027	0.0387188	Yes
row_2	ME1	na	null	null	27	0.520327	0.0563611	Yes
row_3	G6PD	na	null	null	34	0.4982	0.073338	Yes
row_4	TXN	na	null	null	52	0.460007	0.0886417	Yes
row_5	GCLC	na	null	null	57	0.457215	0.104271	Yes
row_6	IDH1	na	null	null	62	0.451548	0.119705	Yes
row_7	CAPN5	na	null	null	103	0.396649	0.132078	Yes
row_8	B4GALT4	na	null	null	110	0.392448	0.14541	Yes
row_9	SOD1	na	null	null	173	0.351142	0.155502	Yes
row_10	BIK	na	null	null	210	0.339761	0.166045	Yes
row_11	GLCE	na	null	null	253	0.326655	0.175941	Yes
row_12	GALK2	na	null	null	265	0.324067	0.186754	Yes
row_13	GAL3ST1	na	null	null	272	0.323348	0.197704	Yes
row_14	GFPT1	na	null	null	353	0.302701	0.205542	Yes
row_15	CLN6	na	null	null	401	0.293534	0.214134	Yes
row_16	ARTN	na	null	null	416	0.290833	0.223704	Yes
row_17	GMPPA	na	null	null	439	0.287869	0.232913	Yes
row_18	GOT2	na	null	null	458	0.285455	0.242167	Yes
row_19	IRS2	na	null	null	467	0.284706	0.251721	Yes
row_20	COG2	na	null	null	476	0.282891	0.261212	Yes
row_21	ANG	na	null	null	554	0.272609	0.26811	Yes
row_22	ISG20	na	null	null	653	0.259815	0.273886	Yes
row_23	SDHC	na	null	null	769	0.246805	0.278661	Yes
row_24	TSTA3	na	null	null	818	0.243137	0.285484	Yes
row_25	BPNT1	na	null	null	845	0.240772	0.29294	Yes
row_26	B3GNT3	na	null	null	983	0.229757	0.296414	Yes
row_27	GOT1	na	null	null	1012	0.228537	0.303383	Yes
row_28	RPE	na	null	null	1140	0.220012	0.306845	Yes
row_29	NOL3	na	null	null	1317	0.209683	0.308363	Yes
row_30	CASP6	na	null	null	1322	0.209298	0.315447	Yes
row_31	SLC25A13	na	null	null	1335	0.208574	0.322246	Yes
row_32	PSMC4	na	null	null	1353	0.207797	0.328857	Yes
row_33	RBCK1	na	null	null	1363	0.207302	0.33571	Yes
row_34	TFF3	na	null	null	1388	0.206038	0.342033	Yes
row_35	PYGB	na	null	null	1438	0.203135	0.347445	Yes
row_36	PFKP	na	null	null	1524	0.199054	0.351548	Yes
row_37	FKBP4	na	null	null	1549	0.197904	0.357591	Yes
row_38	LHPP	na	null	null	1601	0.195538	0.362676	Yes
row_39	GALE	na	null	null	1681	0.192322	0.366742	Yes
row_40	ELF3	na	null	null	1689	0.191804	0.373126	Yes
row_41	MDH1	na	null	null	1726	0.189723	0.378497	Yes
row_42	DPYSL4	na	null	null	1745	0.189074	0.38443	Yes
row_43	GNE	na	null	null	1772	0.188095	0.390069	Yes
row_44	FAM162A	na	null	null	1801	0.186767	0.395598	Yes
row_45	AURKA	na	null	null	1846	0.184774	0.400539	Yes
row_46	EFNA3	na	null	null	1894	0.182393	0.405301	Yes
row_47	DLD	na	null	null	2037	0.176436	0.406776	Yes
row_48	GMPPB	na	null	null	2093	0.174285	0.410998	Yes
row_49	ANKZF1	na	null	null	2099	0.174085	0.416836	Yes
row_50	ALDOA	na	null	null	2240	0.168718	0.41811	Yes
row_51	ERO1L	na	null	null	2254	0.168288	0.423488	Yes
row_52	EGLN3	na	null	null	2291	0.166974	0.428075	Yes
row_53	TPI1	na	null	null	2313	0.166188	0.433122	Yes
row_54	STC2	na	null	null	2369	0.16416	0.436996	Yes
row_55	CENPA	na	null	null	2508	0.159643	0.438021	Yes
row_56	HAX1	na	null	null	2576	0.156962	0.441258	Yes
row_57	RARS	na	null	null	2636	0.155086	0.444689	Yes
row_58	ECD	na	null	null	2657	0.154464	0.449364	Yes
row_59	COPB2	na	null	null	2740	0.15178	0.451935	Yes
row_60	POLR3K	na	null	null	2810	0.149476	0.454848	Yes
row_61	HSPA5	na	null	null	2874	0.147491	0.457888	Yes
row_62	MDH2	na	null	null	2975	0.144225	0.459615	Yes
row_63	SLC37A4	na	null	null	2984	0.144032	0.46432	Yes
row_64	HDLBP	na	null	null	3026	0.142578	0.467904	Yes
row_65	CHPF	na	null	null	3166	0.139024	0.468186	Yes
row_66	HMMR	na	null	null	3177	0.138625	0.472639	Yes
row_67	CDK1	na	null	null	3399	0.132181	0.470025	Yes
row_68	DEPDC1	na	null	null	3449	0.131051	0.472953	Yes
row_69	ALG1	na	null	null	3625	0.126289	0.471628	No
row_70	PMM2	na	null	null	4090	0.116382	0.460586	No
row_71	MIF	na	null	null	4096	0.116243	0.46443	No
row_72	KIF20A	na	null	null	4206	0.114073	0.464825	No
row_73	MIOX	na	null	null	4265	0.112858	0.466834	No
row_74	AKR1A1	na	null	null	4726	0.1037	0.455484	No
row_75	CACNA1H	na	null	null	4755	0.103175	0.458132	No
row_76	NANP	na	null	null	4758	0.103111	0.461621	No
row_77	GPC1	na	null	null	4959	0.0995726	0.458564	No
row_78	LDHA	na	null	null	5277	0.0940418	0.451521	No
row_79	ALDOB	na	null	null	5291	0.0938373	0.454334	No
row_80	SPAG4	na	null	null	5394	0.0920871	0.454198	No
row_81	CLDN3	na	null	null	5601	0.0889098	0.45058	No
row_82	ALDH9A1	na	null	null	5670	0.087848	0.451401	No
row_83	IGFBP3	na	null	null	5772	0.0862237	0.451096	No
row_84	TKTL1	na	null	null	5829	0.0854564	0.452225	No
row_85	CHST4	na	null	null	5980	0.0831651	0.450225	No
row_86	GYS2	na	null	null	6068	0.0819647	0.450228	No
row_87	PC	na	null	null	6114	0.0812963	0.45157	No
row_88	GLRX	na	null	null	6275	0.0788109	0.449095	No
row_89	AK4	na	null	null	6310	0.078337	0.450692	No
row_90	SOX9	na	null	null	6460	0.0765651	0.448497	No
row_91	CHPF2	na	null	null	6653	0.0742136	0.444826	No
row_92	PKP2	na	null	null	6688	0.0736968	0.446263	No
row_93	ARPP19	na	null	null	6978	0.0699187	0.439297	No
row_94	SLC25A10	na	null	null	7077	0.0686665	0.438484	No
row_95	NSDHL	na	null	null	7122	0.0680602	0.439402	No
row_96	PAXIP1	na	null	null	7175	0.0673843	0.440038	No
row_97	MED24	na	null	null	7307	0.0657714	0.438055	No
row_98	ALDH7A1	na	null	null	7588	0.0625165	0.431125	No
row_99	UGP2	na	null	null	7691	0.0612989	0.429929	No
row_100	MPI	na	null	null	8652	0.051131	0.400546	No
row_101	IDUA	na	null	null	8786	0.0498749	0.39795	No
row_102	PGAM1	na	null	null	8978	0.0478561	0.393403	No
row_103	CTH	na	null	null	9516	0.0424228	0.377443	No
row_104	NDUFV3	na	null	null	9702	0.040631	0.372841	No
row_105	PGLS	na	null	null	9717	0.0404886	0.373783	No
row_106	KDELR3	na	null	null	9847	0.0393587	0.370954	No
row_107	SLC35A3	na	null	null	10191	0.0363263	0.361078	No
row_108	PPIA	na	null	null	10345	0.034931	0.357318	No
row_109	VLDLR	na	null	null	10459	0.0338825	0.35482	No
row_110	B4GALT7	na	null	null	10788	0.0312412	0.345255	No
row_111	B4GALT2	na	null	null	10799	0.0311459	0.346004	No
row_112	STMN1	na	null	null	11101	0.0287536	0.33723	No
row_113	B4GALT1	na	null	null	12303	0.0187872	0.298913	No
row_114	FUT8	na	null	null	12452	0.017792	0.294725	No
row_115	B3GAT3	na	null	null	12980	0.0134515	0.278091	No
row_116	P4HA1	na	null	null	13066	0.0128897	0.275777	No
row_117	CHST1	na	null	null	13583	0.00903765	0.259348	No
row_118	GNPDA1	na	null	null	13652	0.00848514	0.257434	No
row_119	AGL	na	null	null	13791	0.00767092	0.253222	No
row_120	ENO1	na	null	null	14271	0.00438448	0.237832	No
row_121	PLOD2	na	null	null	14825	0.000488949	0.219908	No
row_122	MXI1	na	null	null	15081	-0.00120649	0.211677	No
row_123	PGK1	na	null	null	15771	-0.00592309	0.189527	No
row_124	FBP2	na	null	null	15837	-0.00645432	0.187641	No
row_125	PHKA2	na	null	null	15922	-0.00700586	0.185157	No
row_126	AK3	na	null	null	16754	-0.0128944	0.158641	No
row_127	PFKFB1	na	null	null	17511	-0.0186355	0.134756	No
row_128	GUSB	na	null	null	17837	-0.0211197	0.12494	No
row_129	SRD5A3	na	null	null	18384	-0.0251031	0.108092	No
row_130	LHX9	na	null	null	18602	-0.0268237	0.101976	No
row_131	IER3	na	null	null	18658	-0.0273488	0.101134	No
row_132	LDHC	na	null	null	19357	-0.0325192	0.0796095	No
row_133	PYGL	na	null	null	19466	-0.0333724	0.0772559	No
row_134	NASP	na	null	null	19557	-0.0341132	0.0755118	No
row_135	DSC2	na	null	null	19836	-0.0363932	0.067747	No
row_136	NDST3	na	null	null	19973	-0.0375011	0.0646272	No
row_137	PGM2	na	null	null	20183	-0.0392517	0.0591995	No
row_138	GAPDHS	na	null	null	20620	-0.0431189	0.0465404	No
row_139	DDIT4	na	null	null	21083	-0.0472048	0.0331786	No
row_140	TGFA	na	null	null	21239	-0.0487519	0.0298302	No
row_141	COL5A1	na	null	null	21354	-0.0498348	0.0278494	No
row_142	QSOX1	na	null	null	21477	-0.0510078	0.0256494	No
row_143	ZNF292	na	null	null	21712	-0.0533821	0.0198976	No
row_144	SLC16A3	na	null	null	21757	-0.0538879	0.0203275	No
row_145	PPP2CB	na	null	null	22333	-0.0594108	0.00372028	No
row_146	HS6ST2	na	null	null	22776	-0.0645222	-0.00839575	No
row_147	LCT	na	null	null	22794	-0.0647803	-0.00671449	No
row_148	CHST2	na	null	null	23097	-0.0683954	-0.014155	No
row_149	GALK1	na	null	null	23108	-0.0685838	-0.0121155	No
row_150	VCAN	na	null	null	23136	-0.0689126	-0.0106162	No
row_151	GPR87	na	null	null	23357	-0.0713848	-0.0152933	No
row_152	KIF2A	na	null	null	23440	-0.0721424	-0.0154671	No
row_153	B3GALT6	na	null	null	24125	-0.0817795	-0.0348396	No
row_154	PLOD1	na	null	null	24200	-0.0827614	-0.0343879	No
row_155	EXT1	na	null	null	24652	-0.0895311	-0.0459339	No
row_156	EXT2	na	null	null	24987	-0.0952883	-0.0534856	No
row_157	CYB5A	na	null	null	25175	-0.0981819	-0.0561685	No
row_158	SDC1	na	null	null	25267	-0.0999585	-0.0556755	No
row_159	XYLT2	na	null	null	25426	-0.102938	-0.0572536	No
row_160	ADORA2B	na	null	null	25473	-0.103855	-0.0551664	No
row_161	B3GAT1	na	null	null	25624	-0.106612	-0.0563582	No
row_162	AGRN	na	null	null	25721	-0.108452	-0.0557347	No
row_163	ENO2	na	null	null	25726	-0.108485	-0.0521253	No
row_164	PPFIA4	na	null	null	25841	-0.110688	-0.0520087	No
row_165	GYS1	na	null	null	25881	-0.111578	-0.0494282	No
row_166	TPBG	na	null	null	26068	-0.115663	-0.0514761	No
row_167	CHST12	na	null	null	26122	-0.117059	-0.0491609	No
row_168	STC1	na	null	null	26133	-0.117345	-0.0454407	No
row_169	ANGPTL4	na	null	null	26218	-0.11919	-0.0440578	No
row_170	CHST6	na	null	null	26698	-0.130841	-0.0550884	No
row_171	HS2ST1	na	null	null	26790	-0.132957	-0.0534581	No
row_172	SAP30	na	null	null	26849	-0.134493	-0.0507042	No
row_173	RRAGD	na	null	null	26938	-0.136499	-0.0488545	No
row_174	CXCR4	na	null	null	27119	-0.141194	-0.0498277	No
row_175	HK2	na	null	null	27367	-0.148294	-0.0527299	No
row_176	PRPS1	na	null	null	27449	-0.150528	-0.0501695	No
row_177	GPC3	na	null	null	27485	-0.15126	-0.0460915	No
row_178	ME2	na	null	null	27687	-0.157357	-0.0471889	No
row_179	VEGFA	na	null	null	28233	-0.177214	-0.0587625	No
row_180	PAM	na	null	null	28317	-0.180362	-0.0552387	No
row_181	PDK3	na	null	null	28567	-0.191331	-0.0567224	No
row_182	NT5E	na	null	null	28622	-0.193456	-0.0518064	No
row_183	HOMER1	na	null	null	28748	-0.199248	-0.0489943	No
row_184	MET	na	null	null	29053	-0.214142	-0.0514761	No
row_185	P4HA2	na	null	null	29088	-0.216315	-0.0451234	No
row_186	CLDN9	na	null	null	29106	-0.217509	-0.038178	No
row_187	MERTK	na	null	null	29164	-0.220818	-0.0324163	No
row_188	SDC3	na	null	null	29183	-0.222273	-0.0253391	No
row_189	GPC4	na	null	null	29197	-0.223116	-0.0180707	No
row_190	TPST1	na	null	null	29235	-0.225802	-0.0114883	No
row_191	SDC2	na	null	null	29282	-0.228337	-0.00511055	No
row_192	DCN	na	null	null	29425	-0.238419	-0.00149984	No
row_193	IL13RA1	na	null	null	29539	-0.247942	0.00337997	No
row_194	CITED2	na	null	null	29683	-0.26129	0.00774653	No
row_195	CD44	na	null	null	30055	-0.314016	0.00653336	No
row_196	TGFBI	na	null	null	30120	-0.334623	0.0159905	No
row_197	EGFR	na	null	null	30188	-0.372282	0.0266484	No
row_198	PGAM2	na	null	null	30429	NaN	0.0192067	No
